# Supplementary material for: Long Noncoding RNA SNHG7 Is a Diagnostic and Prognostic Marker for Colon Adenocarcinoma
Source: Front Oncol. 2022 Jun 7;12:893591. doi: 10.3389/fonc.2022.893591 (PMC9209656; doi:10.3389/fonc.2022.893591)
Supplement: Supplementary file 6 [file Table_6.xlsx]

## Sheet: Sheet 1
gene_name	log2FoldChange
TSPAN6	-0.136713
TNMD	-0.200509
DPM1	-0.125264
SCYL3	-0.15339
C1orf112	-0.0932075
FGR	-0.409208
CFH	-0.667097
FUCA2	-0.071712
GCLC	-0.131411
NFYA	-0.0777116
STPG1	-0.0370229
NIPAL3	-0.0183649
LAS1L	0.152148
ENPP4	-0.39593
SEMA3F	0.314481
CFTR	-0.171809
ANKIB1	-0.239994
CYP51A1	0.278373
KRIT1	-0.226698
RAD52	0.0597784
MYH16	0.0374719
BAD	0.175588
LAP3	-0.0430337
CD99	0.0030058
HS3ST1	0.173175
AOC1	0.179569
WNT16	0.0900527
HECW1	-0.843588
MAD1L1	0.292214
LASP1	0.0606189
SNX11	-0.00724768
TMEM176A	0.416734
M6PR	0.0106908
KLHL13	0.113453
CYP26B1	-0.190881
ICA1	0.0693498
DBNDD1	0.255966
ALS2	-0.18081
CASP10	-0.197455
CFLAR	-0.352914
TFPI	-0.49511
NDUFAF7	-0.073665
RBM5	-0.0331435
MTMR7	-0.926298
SLC7A2	-0.429774
ARF5	0.418301
SARM1	0.0567981
POLDIP2	0.213145
PLXND1	-0.0344461
AK2	0.0554045
CD38	-0.690947
FKBP4	0.411769
KDM1A	-0.00878638
RBM6	-0.089879
CAMKK1	0.2211
RECQL	-0.347574
VPS50	-0.190433
HSPB6	-0.768219
ARHGAP33	0.356909
NDUFAB1	0.12761
PDK4	-0.34732
SLC22A16	-0.368175
ZMYND10	0.543727
ABCB5	-1.70977
ARX	0.589239
SLC25A13	-0.0429311
ST7	0.0369015
CDC27	-0.418375
SLC4A1	-0.428187
CALCR	-0.607785
HCCS	0.00234632
DVL2	0.272121
PRSS22	0.136342
UPF1	0.274621
SKAP2	-0.252305
SLC25A5	0.444167
MCUB	-0.203723
HOXA11	0.0874417
POLR2J	0.371355
DHX33	-0.000636163
MEOX1	-0.527344
THSD7A	-1.29677
LIG3	0.0070925
RPAP3	-0.125932
ACSM3	-0.174092
REXO5	-0.0376503
CIAPIN1	0.170953
SPPL2B	0.559571
FAM214B	-0.107159
COPZ2	-0.296051
PRKAR2B	-0.366788
MSL3	-0.143281
CREBBP	-0.0471265
TSPOAP1	-0.222186
MPO	-0.568028
PON1	-0.121315
GCFC2	-0.251365
WDR54	0.402078
CROT	-0.101934
ABCB4	-0.192673
KMT2E	-0.346083
RHBDD2	0.367452
SOX8	0.679082
IBTK	-0.35623
ZNF195	-0.197496
MYCBP2	-0.438503
FBXL3	-0.227415
ITGAL	-0.363552
PDK2	0.2667
ITGA3	0.0893285
ZFX	-0.508842
LAMP2	-0.302513
ITGA2B	0.533704
ASB4	-0.44754
GDE1	-0.104813
REX1BD	0.863206
CRLF1	0.118211
OSBPL7	0.274237
TMEM98	0.119322
YBX2	0.215741
KRT33A	0.328098
MAP3K14	0.115963
ABCC8	0.257827
CACNG3	-0.223391
TMEM132A	0.283016
AP2B1	-0.0193663
TAC1	-0.244569
ZNF263	0.0163396
CX3CL1	0.000551753
SPATA20	0.284717
CACNA1G	-0.23821
TNFRSF12A	0.147152
DLX6	0.463396
MAP3K9	-0.0597352
RALA	0.00395332
BAIAP2L1	0.15572
KDM7A	-0.332456
ETV1	-0.462757
AGK	0.00177938
ALDH3B1	0.189068
TTC22	0.0750615
PHTF2	-0.333244
CCL26	0.324353
FARP2	-0.0998097
USH1C	0.27734
GGCT	0.10814
DBF4	-0.121472
TBXA2R	-0.0159316
IFRD1	-0.0767479
LGALS14	1.25976
COX10	0.0320472
GTF2IRD1	0.20954
PAF1	0.262391
VPS41	-0.131231
ARHGAP44	-0.416326
ELAC2	0.203835
SCIN	-0.0158224
ARSD	-0.0455376
PNPLA4	0.120913
MYH13	-0.769043
ADIPOR2	0.0405733
CDKL3	-0.22315
UPP2	-0.734175
PRSS21	-0.417868
MARK4	0.180581
PROM1	-0.118141
CCDC124	0.505382
CEACAM21	-0.085533
PAFAH1B1	-0.173079
NOS2	0.0904348
DNAH9	-0.0899524
KIAA0100	-0.0254278
SLC13A2	0.323494
GAS7	-0.508404
TRAPPC6A	0.438193
MATK	0.316486
CEACAM7	-0.601627
CD79B	-0.108372
SCN4A	-0.218035
ST7L	-0.308158
TKTL1	0.0210095
PAX6	-0.149091
RPUSD1	0.499544
RHBDF1	0.225676
LUC7L	-0.0218436
CACNA2D2	0.359157
BAIAP3	0.294339
TSR3	0.325703
PIGQ	0.424452
CRAMP1	0.0291699
TEAD3	0.109501
SELE	-0.953339
DNAJC11	0.0779948
FMO3	-0.465218
MYLIP	-0.00348198
NOX1	-0.02482
E2F2	0.109226
PSMB1	0.180809
SYN1	-0.215916
JARID2	-0.0871504
CDKL5	-0.774205
CAMK1G	-0.501948
CDK11A	0.175811
NADK	0.1319
TFAP2B	-0.376256
TFAP2D	-0.00437519
DLEC1	0.146106
CYTH3	-0.0374836
ADAM22	-0.479602
SYPL1	-0.0898417
CYB561	0.121287
SPAG9	-0.409835
CELSR3	0.276092
AASS	-0.636123
PLEKHG6	0.218287
SS18L2	0.0692137
MPND	0.357875
MGST1	0.162325
CRY1	-0.0849177
PGLYRP1	-0.271197
NFIX	0.106433
ST3GAL1	-0.15724
MMP25	-0.0170309
IL32	0.132567
PKD1	0.2103
MAPK8IP2	0.369674
MED24	0.193405
RHOBTB2	0.180235
HEATR5B	-0.248538
SEC62	-0.215853
RPS20	0.249299
CSDE1	-0.197575
UBE3C	-0.0347751
REV3L	-0.72214
TENM1	-1.34845
PAX7	-1.2459
MASP2	-0.531808
IYD	-0.0715571
FAM76A	-0.260783
TRAF3IP3	-0.617159
POMT2	0.115658
VTA1	-0.158026
MLXIPL	0.559008
BAZ1B	-0.035003
RANBP9	-0.183296
ETV7	0.184343
SPRTN	-0.101611
EEF1AKNMT	0.187843
DYRK4	0.31196
ZNF207	-0.0691797
UQCRC1	0.448138
STARD3NL	-0.0471194
CD9	0.161435
HHATL	0.260987
NCAPD2	0.112839
IFFO1	-0.0875362
GIPR	0.0794058
PHF7	-0.0307275
SEMA3G	-0.583395
NISCH	0.221041
STAB1	-0.0658514
FUZ	0.0416142
SLC6A13	0.150118
IDS	-0.355586
PRSS3	0.414559
ZNF200	-0.157863
CD4	-0.358676
LRRC23	0.156488
BTK	-0.491539
HFE	-0.0786348
SCMH1	-0.029879
FYN	-0.26892
HIVEP2	-0.439332
FMO1	-0.528555
ELOA	-0.157569
LYPLA2	0.170646
CLCN6	-0.0869762
MRC2	-0.267718
NME1-NME2	0.169484
SLC6A7	0.29712
TSPAN9	0.107805
BTBD7	-0.319739
APBA3	0.572501
MKS1	0.0908278
ABHD5	-0.213621
ANOS1	-0.711059
AKAP8L	0.219889
MBTD1	-0.394178
UTP18	-0.0462162
RNF216	0.074854
TTC19	-0.123561
PTBP1	0.241847
DPF1	0.317674
SYT7	0.0845262
LARS2	-0.0372073
PIK3C2A	-0.531569
PLAUR	0.0158321
ANLN	-0.102821
WIZ	0.259732
RABGAP1	-0.111815
DCN	-0.59059
QPCTL	0.362961
PPP5C	0.310319
CEP68	-0.173265
MAP4K3	-0.227965
ZBTB32	-0.237415
TYROBP	0.0252116
TMEM159	0.0526475
GABRA3	-0.00440695
BRCA1	-0.0987232
ERCC1	0.236112
CD22	-0.494581
SEMA3B	0.308688
MBTPS2	-0.291936
PRICKLE3	0.28609
LTF	-0.288726
EXTL3	0.0969093
NR1H4	0.348157
ELOVL5	-0.232949
ALOX5	-0.00145835
KDM5D	0.0283919
CALCOCO1	-0.00641865
UBR7	-0.0996348
MAP4K5	-0.432981
EHD3	-0.169979
PSMC4	0.238467
MAN2B2	-0.0075642
SLC7A14	-1.14283
CLDN11	-0.45969
SLC25A39	0.374751
MVP	0.0886006
NUB1	0.00876736
PGM3	-0.232222
RWDD2A	-0.0949095
CLK1	-0.191905
POLR3B	0.0668937
ANGEL1	0.0289239
RNF14	-0.11721
DNASE1L1	0.169553
DDX11	0.330889
HEBP1	0.159262
GPRC5A	-0.140968
MAMLD1	-0.357247
CD6	-0.032472
TACC3	0.230106
UFL1	-0.310604
POLA2	0.2155
ZC3H3	0.345882
CAPN1	0.271964
ACP3	0.0836756
MDH1	0.0388053
SLC30A9	-0.226534
MTMR11	0.07659
COX15	0.0275597
CCDC88C	0.0589448
YAF2	-0.370979
ZMYND11	-0.201837
WAS	-0.146432
DPEP1	0.606631
BID	0.346479
MATR3	-1.04665
NPC1L1	0.916611
XYLT2	0.195003
RGPD5	0.0398249
STMN4	-0.463008
NUDCD3	0.204674
ISL1	0.403355
CHDH	0.0598559
IL20RA	0.075219
CLCA1	0.168079
CLCA4	-0.87253
GLT8D1	-0.040195
ATP2C1	-0.128346
IGF1	-0.750417
SLC38A5	0.538607
RALBP1	0.0305734
RUFY3	-0.46728
CNTN1	-0.931345
SLC11A1	-0.283377
WWTR1	-0.702465
AGPS	-0.30454
ZNF806	-0.143727
CXorf56	-0.0760674
ATP1A2	-0.95268
TTC27	-0.0331624
ZNF582	-0.538052
VSIG2	-0.163257
PHLDB1	-0.224508
MARCO	-0.121318
CYP24A1	-0.319148
PRDM11	0.179795
SYT13	-0.0587296
SNAI2	-0.498683
CD74	-0.10895
HGF	-0.816402
ZRANB1	-0.147548
NCDN	0.194544
ADGRA2	-0.190482
CCT8L1P	-0.519156
ZFP64	0.127763
MNAT1	-0.0814265
SAMD4A	-0.66908
RUNX3	0.155207
MRE11	-0.240159
PLEKHB1	0.159067
SERPINB1	0.105699
CYP3A43	-0.48322
SLC7A9	1.70942
SPAST	-0.270238
NRXN3	-0.000616919
OSBPL5	0.191233
AQR	-0.112286
CPS1	0.896346
C8B	-0.700399
FHL1	-0.624927
RTF2	-0.0066428
GABRA1	-0.620669
NLRP2	-0.20194
SLC45A4	0.104388
RNF10	0.0640773
ZNF839	0.125216
ZDHHC6	0.0368694
GRAMD1B	-0.027033
RNH1	0.278391
NDUFS1	-0.136576
RB1CC1	-0.472357
ERP44	-0.029097
ALAS1	0.0293388
BIRC3	-0.575179
AKAP11	-0.5334
GLRX2	-0.01469
SNAPC1	-0.134117
DERA	6.0995e-05
STRAP	0.0315924
ABCC2	0.546035
DEF6	0.246274
PLEKHO1	-0.282103
GCLM	-0.455425
UBR2	-0.308005
EHD2	-0.303004
DEPDC1	-0.273522
CCDC28A	-0.0071668
RRAGD	-0.451862
HSF2	-0.0967206
PHF20	-0.23469
HSD17B6	-0.510201
NR1H3	0.244998
TYMP	0.121364
NCAPH2	0.343422
TOMM34	0.073726
SEC63	-0.213351
KPNA6	-0.238798
VIM	-0.354254
RTEL1-TNFRSF6B	0.310269
FAS	-0.331658
RNASET2	0.0225505
CD44	-0.132737
KCNG1	-0.0926706
AGPAT4	-0.450113
SLAMF7	-0.428627
BTN3A1	-0.146151
MIPEP	0.0593189
PRKCH	-0.357056
INSRR	0.252571
IFNGR1	-0.171845
B4GALT7	0.417939
SH2D2A	0.196379
VRK2	-0.295591
TNFRSF1B	0.0164679
VEZT	-0.219852
POU2F2	-0.490636
BRD9	0.229966
SNX1	-0.026605
TBPL1	-0.165771
ARNTL2	-0.282399
BCLAF1	-0.327767
SLC39A9	-0.166959
ANK1	-0.176276
IBSP	-0.541636
TFB1M	-0.00187127
RABEP1	-0.248094
HMGB3	-0.0444412
NUP160	-0.10538
BAK1	0.193686
MUSK	-1.34158
IKZF2	-1.01152
GRN	0.235647
FAM13B	-0.43489
ARHGAP31	-0.616904
CENPQ	-0.165904
SARS1	0.197755
RANBP3	0.267828
ARID4A	-0.333277
EIPR1	0.259251
PNPLA6	0.546323
IFT88	-0.139761
ALG1	0.0785098
ZCCHC8	-0.0864399
ABCF2	0.20809
CHPF2	0.105906
LRRC7	-0.852038
FUT8	-0.195186
UBA6	-0.400536
GAB2	-0.0244783
ATP6V0A1	-0.0487823
PIAS1	-0.232609
SLC4A7	-0.780876
APBA2	-0.094846
MAP2K3	0.148217
EFCAB1	-0.478362
TMSB10	0.173759
ASTE1	-0.110729
RNF19A	-0.324278
PEX3	-0.174369
GABARAPL2	-0.00188046
MYOC	-0.989388
SH3YL1	0.00578322
FAM136A	0.131896
VCL	-0.304981
DEPDC1B	0.046908
DAPK2	-0.0630006
NSMAF	0.0207488
ADSS2	-0.0617948
STAP1	-0.419504
TIMP2	-0.412318
RFC1	-0.131766
TBC1D23	-0.278895
CUL3	-0.129712
MYOM2	0.292756
OTC	1.26984
CYP46A1	-0.526834
ZZZ3	-0.318576
SLC18A1	0.925801
USP2	-0.375875
CASR	-0.411095
TUBG2	0.124529
RPL26L1	0.205118
FLT4	-0.173405
NSUN2	0.0341697
FBXO42	-0.0634338
MFAP3	-0.387768
MRI1	0.284857
METTL1	0.279642
HOXC8	-0.276612
AGA	-0.145687
PI4K2B	-0.217885
BOD1L1	-0.403228
MAT2B	-0.004677
TLL1	-1.03324
EDC4	0.21766
TRIO	-0.314108
VCAN	-0.991077
CLEC16A	-0.0534033
MSR1	-0.771834
CDH1	-0.12763
MTREX	-0.0429178
DNAH5	-0.384213
ZFYVE16	-0.498046
RIPOR1	-0.0495378
C6	-0.760977
RAI14	-0.544016
SOX30	0.352501
PNKP	0.350974
BEST2	0.1958
PHLPP2	-0.461552
SPDL1	-0.0173657
STAU2	-0.380812
SLC66A1	0.274441
CTNS	0.00880536
RTN4R	0.423478
PHF23	0.113632
CDH10	-1.26379
INPP4A	-0.221213
RAB27B	-0.246419
PSMA4	-0.0106444
MYO16	-0.982397
LSG1	-0.0281499
PARP3	0.151605
TNC	-0.671617
THAP3	0.328412
RIPOR3	-0.198772
TDP1	-0.0220284
AIFM2	0.232755
C2orf83	-0.373565
SPATA7	-0.142695
MED17	-0.111632
RETSAT	0.0282176
CAPG	0.220184
AP2S1	0.444483
USH2A	-0.881603
ZPBP	-0.470726
TG	0.370089
ADAM28	-0.574787
BARX2	0.459111
DCUN1D1	-0.471298
JADE2	0.199725
ZIC2	0.0592767
LCP2	-0.75757
TRIT1	-0.120901
ADRB1	-0.147897
GUCA2B	-0.487445
CUL7	0.169842
CTNNA1	0.0310581
PHKA2	0.00575919
CNTLN	-0.637435
EPHA3	-0.827722
HSPA5	0.0601624
DSG2	-0.0885892
GEMIN8	-0.00358057
OFD1	-0.193434
GPM6B	-0.885043
MAGEC2	0.441644
PREX2	-1.11938
WDR37	-0.0153344
YTHDC2	-0.269992
CTPS2	-0.0810855
ATP6V1H	0.0507173
POLR2B	-0.103995
FAM214A	-0.437758
ARAP2	-0.492298
TPR	-0.168054
CP	-0.708602
KIAA0556	-0.022233
DTNBP1	0.0878703
XK	-0.0929378
ANO2	-0.490178
C12orf4	-0.193327
SCML1	-0.395623
WWC3	-0.243058
ARHGAP6	-0.21644
FAM184B	-0.306739
MAP4	-0.0252123
GOPC	-0.242319
ROS1	-0.45258
USP28	-0.246379
HDAC9	-0.526517
TSPAN17	0.182688
NOP16	0.346371
CC2D2A	-0.678718
RRM2B	-0.367721
ZNF800	-0.344359
TNFRSF17	-0.445739
SNX29	-0.308788
LMO3	-1.4041
MRPS10	-0.124456
GUCA1A	-0.308199
RSF1	-0.422963
VPS13D	-0.4393
CELF2	-0.475362
FAM120A	0.0231032
R3HDM1	-0.0911733
COL9A2	0.208097
KITLG	-0.277565
ERCC8	-0.131686
ADAMTS6	-0.793544
H6PD	-0.0833713
VAMP3	-0.0946829
PER3	-0.251613
UTS2	0.533953
TNFRSF9	-0.564927
EPN3	0.24571
LTBP1	-0.434927
RCN1	-0.0773387
ELN	-0.25063
RFC2	0.23097
ARID1B	-0.07863
CLPTM1L	0.198041
NEDD4L	-0.116158
FOXP3	-0.259512
PPP1R3F	0.135432
HEXB	-0.061748
PTCD2	-0.154941
NEXMIF	-1.55072
JKAMP	-0.189547
DKK3	-0.193845
ARHGEF5	0.125562
NFE2L3	-0.0457571
MCUR1	0.0246486
LIMA1	-0.159932
LETMD1	0.275386
SLC4A8	-0.36149
LAMC3	0.135801
PTGER3	-0.903893
TNIP3	-0.704488
MAPK9	-0.0247923
COL23A1	-0.0209024
BCAR1	0.314433
FAM160A2	0.0603478
HERPUD1	-0.167979
HOMER3	0.223852
RAD51	0.245835
POLQ	-0.30092
PIK3CB	-0.311212
CYBA	0.541936
THOC3	0.185718
HEBP2	0.0345232
MPHOSPH9	-0.378655
PLEKHA5	-0.158393
PRSS8	0.0670769
SIKE1	-0.358005
RRP12	0.332616
FNIP2	-0.459448
MSMO1	-0.175746
TTC17	-0.0854203
ALX4	-1.71745
FSTL4	0.0315448
FOXN3	-0.475307
METTL24	-0.897569
AKR7A2	0.285782
MRTO4	0.24031
NNAT	-0.592773
USE1	0.359803
MCF2L2	-0.747618
NRIP2	-0.0835505
LAMA3	-0.130764
AP5M1	-0.316169
ANAPC4	-0.171123
KCNQ1	0.29288
TRAPPC3	-0.00687452
THRAP3	-0.101209
PHPT1	0.627656
ENTPD2	0.438799
LY75	-0.147352
ARID4B	-0.363973
OPN3	-0.0622444
SDCCAG8	-0.179021
PTPRN	-0.301597
HHAT	-0.105511
KIF1B	-0.351902
FOXC1	0.180377
TBC1D22A	0.155655
SYNE2	-0.47464
PLEKHH1	0.0211429
ATP9A	-0.226224
SPO11	-0.356217
CBLN4	-0.32242
CHRDL2	-0.781743
FAM168A	-0.24674
RELT	0.18539
GALC	-0.175319
NOP58	0.0244724
SZRD1	0.144057
KCNH2	0.462592
CUL1	0.0171468
FAM114A2	-0.286928
CYFIP2	0.113691
TAB2	-0.305946
GINM1	-0.257008
EIF2AK2	-0.370366
USP36	0.143268
KMT2C	-0.565814
MCOLN3	-0.0595378
CCDC85A	0.0133384
PUM2	-0.198958
MRPL43	0.450309
ITIH4	-0.721173
ITIH1	-0.612639
HPF1	-0.0648521
ZFR	-0.12887
ZNF280C	-0.346134
NPFFR2	-0.16032
PHF21B	-0.0215331
TRAF1	-0.00441123
RC3H2	-0.36655
IL17RB	-0.0108995
TRAF3IP2	0.142762
GYG2	-0.144653
DCBLD2	-0.527043
SERPINB3	-0.357215
SOAT1	-0.502687
PKP2	-0.0038528
MSH4	-0.381049
F7	1.30632
GDI2	0.0424639
PRDM1	-0.536171
ATG5	-0.151152
TMCC3	-0.192706
PITHD1	0.100907
MTA3	0.00639743
USP13	-0.169301
ATP11B	-0.389198
LAMC2	-0.095478
CDK14	-0.690958
SEC61A1	0.0952565
PPP1R12A	-0.409547
RASGRF1	-0.211457
CAMK2B	0.200384
CROCC	0.271132
POLR3E	0.196415
ATP2B4	-0.564332
ZC3H11A	-0.267808
RIOK2	-0.0411364
YIPF1	-0.0855001
NDC1	-0.166387
DGKG	-0.176377
FLYWCH1	0.222499
UNKL	0.230705
TBXAS1	-0.0304324
PARP12	0.0381438
ALDH18A1	0.0628223
TARBP1	-0.10732
GATB	0.0571097
MXD1	-0.432163
CDK17	-0.47129
DNAJC25	-0.000844862
SLC2A3	-0.621696
PSD	-0.205396
CTDP1	0.206421
YBX3	0.117292
STYK1	-0.202369
WNK1	-0.253331
RPS17P5	0.347386
CCAR1	-0.145177
OGFR	0.262389
GNA15	-0.0646332
CREB3L3	0.697302
PIGV	0.0117082
PTPRU	0.254201
SNRNP40	0.0651622
RIMBP2	0.207462
COL11A1	-0.669684
QSER1	-0.608857
MPC1	-0.00920976
ACAA1	0.209258
BCAT1	-1.24868
HDAC7	0.0661857
LZTS1	-0.334676
PRDM6	-0.730836
WNT8A	-0.191503
SPAG4	-0.0869535
NCKAP1	-0.256764
MRPS35	0.0616584
GUCY1B1	-0.574174
SFSWAP	0.101267
TNK2	0.316043
MON2	-0.524698
CDH3	0.162425
ARSF	-0.810049
GPBP1	-0.133829
DGAT2	0.155737
ZNF112	-0.132009
CS	0.15545
LTK	0.495266
MRPS24	0.73994
ELMO2	-0.180323
WAPL	-0.179443
VMP1	-0.454927
APPBP2	-0.305337
POLD1	0.614764
SEZ6	-0.716123
EIF4B	0.116793
SLC6A16	-0.484485
BICRA	0.288582
SPHK2	0.395354
RPL18	0.661114
CA11	0.0959709
ISOC2	0.470661
U2AF2	0.283305
EPN1	0.487098
MED29	0.0535256
AHRR	0.210348
GSC2	0.33329
ZNF275	-0.113478
MTMR1	0.0449081
GPC1	0.0819065
ADCK1	0.215365
HAGH	0.364263
RNF4	-0.0212652
CASP8	-0.206122
LIMCH1	-0.338746
INTS13	-0.00721176
TM7SF3	-0.0443081
DLX3	0.287033
SPA17	-0.248562
TSPAN32	-0.565849
CCN5	-0.619862
DMRT3	0.00755586
ST3GAL6	-0.790712
ATP2C2	0.21866
NGFR	-0.49838
CDON	-0.281272
TAF2	-0.187901
HIPK2	-0.321445
TNPO3	0.0190077
BORCS8-MEF2B	0.0804952
RFXANK	0.465071
TMEM161A	0.631086
LPAR2	0.563176
CTSA	-0.0743194
SUGP2	0.0513837
SLC12A2	-0.166592
SNX24	-0.271644
EYA2	0.098928
CNN2	0.136722
ABCA7	0.346002
SNCAIP	-0.0433895
DDX20	-0.170697
BTBD1	-0.163786
FAR2	-0.181634
BCAS1	-0.23899
POU1F1	-0.355096
CHI3L2	-0.762869
SBNO2	0.368148
PMS1	-0.181017
HMG20B	0.310451
CALCRL	-0.87314
TAF11	-0.0350784
ANKS1A	-0.0429067
AP3D1	0.278009
ZNF76	0.2635
SLC9A3R2	0.233416
NTHL1	0.509974
UHRF1BP1	-0.265645
GNAI3	-0.226281
IPO5	0.120938
OAT	-0.0873299
WDR3	-0.0934257
PKN2	-0.379651
WDR18	0.590466
TRAM2	-0.238995
NTN1	-0.0785272
GLP2R	-0.474037
MCM10	0.00639974
DGKA	-0.00392712
ERBB3	0.0737098
ROPN1	-0.326802
ANKRD44	-0.901017
KARS1	0.0651425
ADAT1	-0.245489
PDIA5	-0.0686493
TBC1D22B	-0.0492989
NDUFB4	0.0502158
SPEN	-0.0820606
MYLK	-0.958066
ZC3H15	-0.0814231
MAP2K4	-0.287483
PACC1	0.0832183
SNAP91	-1.40971
SLK	-0.248873
CYB5R4	-0.30827
COL17A1	0.120778
GSTO2	0.334432
SEC61A2	-0.270052
PRKCQ	-0.199494
TLE2	0.678422
ASB1	0.045991
FAM107B	-0.355496
ME1	-0.0326007
TBC1D1	-0.170872
CDK13	-0.126213
MTHFD2	0.168557
SLC9A7	-0.187019
FOXJ2	-0.0442069
YBX1	0.0592491
PDE4A	0.123968
PPP2R5A	-0.0779446
CTNNA2	-0.215806
ELAVL1	0.139569
TIE1	-0.272266
DIP2B	-0.216956
SMARCD1	0.125886
KDM4A	-0.0638296
NFYC	0.135763
ZMYND12	-0.295555
SLC9A3	0.456035
NGEF	0.228952
ASPM	-0.345296
CD84	-1.01231
ELOVL1	0.146887
SPI1	-0.115424
ZNRD1	0.341982
MPPED2	-0.864757
CLDN18	-0.360507
ZBTB11	-0.306739
ATXN3	-0.448045
GOLGA5	-0.161651
FGFR2	-0.072025
LRRC40	-0.316181
ISOC1	0.0314996
EML1	-0.347894
TRMT11	-0.0534768
THUMPD1	-0.31581
MSANTD3	-0.101436
KIF26A	0.368406
ATG2B	-0.41089
ARFGEF1	-0.294713
ACSM2B	-1.08193
ZFAT	-0.0624457
MTFR1	-0.088219
STAG3	-0.462821
FECH	-0.108539
MYO9A	-0.682219
DDX3Y	-0.0509782
PFKP	0.339319
IDI1	-0.103873
SP100	-0.282602
KLF6	-0.37281
PLPP1	-0.228376
NEO1	0.0234147
TRAM1	-0.235794
PHKA1	-0.0658837
TNFRSF1A	0.123943
CACNB1	-0.103256
EVI5	-0.618048
STOML1	0.208955
PKM	0.254304
DHX29	-0.133831
DNTTIP2	-0.17564
METTL22	0.127783
TP53BP1	-0.107054
TRO	-0.177267
RRP15	-0.176314
RHOA	-0.0455573
DHX8	-0.0237284
PMS2P4	0.0441466
PRKCZ	0.243053
ZFY	-0.14247
IARS2	-0.0872843
SYT1	-0.000249346
NAV3	-0.766466
IDH3G	0.573775
ROGDI	0.26652
PDZD4	-0.36701
ATP2B3	-0.665545
ROCK1	-0.390805
CBFB	-0.247067
PDK3	-0.347734
HYAL2	0.286174
HDAC4	-0.0732438
RASSF1	0.380701
FGFR3	0.451678
IFI35	0.0738593
HEATR6	-0.123122
COASY	0.236158
PLEKHH3	0.328844
MEF2A	-0.402619
OTUD5	0.169385
TFE3	-0.0108765
TBC1D25	0.154404
ACSL4	-0.406406
INPP5A	0.0645854
GPKOW	0.116492
GRIPAP1	0.0862999
FTSJ1	0.13721
PRR11	-0.0429531
REEP1	-0.526417
ATP11A	0.147638
POLR1A	0.0746827
LAPTM4A	-0.0395765
TTC7A	0.109191
IP6K2	0.187849
STON1-GTF2A1L	-1.10133
SRBD1	-0.293433
KIF2A	-0.252516
RASGRP2	-0.15588
PSME4	-0.268507
IFT80	-0.374307
SIRT2	0.1047
ERLEC1	-0.147556
PPP2R5B	-0.0447074
PYGM	-0.360615
PAGE1	-0.061384
PITX1	0.662093
TRPC7	-0.441666
MAST4	-0.404409
ADGRF5	-0.657158
SDK2	-0.307617
ADAM7	-0.447327
NUP133	-0.0473254
NUCKS1	-0.164254
VPS35	-0.206744
DNAJA2	-0.062323
BCL3	0.335095
KCNAB2	0.0842443
ABCC9	-1.09635
GAL	0.612209
CLEC2D	-0.716005
FUNDC1	-0.190137
MAOB	-0.374209
RORA	-1.14068
DRD4	0.814952
TGFBR3	-0.25312
PLA2G10	0.168896
HES2	0.147112
ATP1B3	-0.00307183
NEDD4	-0.298582
PIGB	-0.189779
MAPK6	-0.160766
GNB5	-0.104374
RAB27A	-0.29919
HDHD5	0.337275
UFD1	0.0580731
LRP6	-0.316529
GUCY2C	0.0704294
SCT	1.15582
PHRF1	0.129753
ELP1	0.0378376
NUCB2	-0.294213
PFN2	-0.313011
PTPN3	-0.00786614
SPTB	-0.260813
DAPP1	-0.401448
FGF10	-0.869157
SLC44A1	-0.093453
TMEM260	-0.129603
SMG6	-0.151035
EXOC5	-0.48508
CLTCL1	-0.217768
FGF22	0.423197
FSTL3	0.264653
DGCR2	0.157437
RNF126	0.566697
MNT	0.185076
ZXDC	0.0669938
JMJD6	0.152666
POLB	-0.123409
ST6GALNAC1	0.214365
WIPI1	-0.204443
FRMPD1	0.441148
GBA2	0.245601
NDST1	-0.0255012
ASNS	0.403369
AP3M2	0.0438089
CNGB1	-0.405937
ST6GALNAC2	0.0540384
CHAT	0.357358
PABPC1	0.232307
TESK2	0.022831
CFAP20	0.160882
CSNK2A2	0.0659435
PTPN21	-0.241571
EIF2B3	0.0726855
CAMK2A	-0.59119
TCOF1	0.239334
CDC42	-0.246811
OSBPL3	-0.0620176
EPHA8	1.23447
SLC12A3	0.0564084
RAD18	-0.0814744
ATP2B1	-0.324624
TRPM5	0.707446
NCK2	0.175062
MAP4K4	-0.107126
MGAT4A	-0.399758
RPL31	0.393872
WDR1	0.133513
SNX13	-0.418124
MS4A12	-0.817777
ARHGAP10	-0.214449
RPS6KA2	-0.128033
ING3	-0.0379954
VASH1	-0.318705
LMCD1	-0.282024
BUD23	0.20532
SEL1L	-0.427935
TRIP13	0.174751
ATP6AP1	0.192296
TCF3	0.451076
TRIB2	-0.229641
DAZAP1	0.29789
MBD3	0.461936
PRLH	0.292059
HLTF	-0.362381
FAM50A	0.418595
FAM3A	0.419821
CPSF1	0.543326
MYO3B	-0.0875951
CYBRD1	-0.613593
CDH19	-0.969248
PDCD2	0.0610223
SLC6A15	0.0972164
RDH11	-0.140175
PRKACA	0.0301597
ADGRL1	0.225771
SPP2	-0.111797
ACTN1	-0.0770616
ZFYVE26	-0.244976
RPS6KA6	-0.583331
EPN2	0.0536167
PTPN18	0.0666777
LIMS2	-0.168748
ASIC4	0.617248
SPEG	-0.245531
LNX1	0.10759
ALDH3A2	-0.00286258
TFRC	-0.169066
SREBF1	0.341221
TRPC5	-2.49483
AFF4	-0.522545
UBE2D1	-0.230825
MPP5	-0.296555
RHOBTB1	-0.417571
SMC1A	-0.0973359
HSD17B10	0.380284
MARK2	0.130846
HMMR	-0.0114636
CHFR	-8.26582e-05
TRHDE	-0.435746
P4HA2	0.0131147
FCGR2B	-0.674811
NFATC3	-0.213189
TRNT1	-0.167509
ACADVL	0.233196
STK10	-0.0110364
FBXW11	-0.142831
ACAP1	0.00103227
CRMP1	-0.119143
EVC	-0.65195
DERL2	-0.168991
SIDT1	-0.152179
NDE1	-0.0380073
IRAG1	-0.63035
TMEM38A	0.107276
AP1M1	0.297634
PVR	0.205303
XRCC1	0.283308
SCARB1	0.312392
CYP2W1	0.327654
MCM2	0.358329
MOV10L1	-0.503879
PANX2	0.658287
SELENOO	0.512195
TP63	-0.602522
ALPK1	-0.33621
LLGL2	0.31254
PDE8A	-0.234625
CLCN4	-0.224217
NLE1	0.469834
SDHA	0.287821
SMARCE1	-0.196924
FNDC8	0.253005
GSDMB	-0.125125
KDM5A	-0.263059
ADAM11	0.447711
PPP2R3A	-0.739303
FERMT2	-0.749341
ABCB11	-0.765955
DHRS9	-0.143227
CD5L	-0.629894
PTGS2	-0.456653
IGF2BP2	0.0823426
MAP3K13	-0.194504
ST6GAL1	-0.17079
TBX21	-0.288427
VDAC1P1	0.412486
FRY	-0.59302
PICALM	-0.350973
NSF	-0.115531
GLI2	-0.253339
CLASP1	-0.149513
MRPS34	0.581607
NOTCH3	0.0407741
CLNS1A	0.0872526
PPP2R2C	0.355064
TEAD2	0.00785432
EED	-0.0338495
CDHR2	0.409315
SNCB	0.184243
TSG101	0.0169461
NCBP3	-0.156115
ATP2A3	0.241547
CA12	-0.0779022
MGLL	-0.0127977
NTN4	-0.0459013
BCS1L	0.348461
NUAK1	-0.448643
DPP8	-0.323831
SLC24A1	-0.0850306
ZNF532	-0.49842
SCARF1	-0.0331155
LMAN1	-0.268929
HACD3	0.0995844
IPCEF1	-0.507929
ZZEF1	-0.145526
NOX3	-1.07212
ENO1	0.189007
SLC12A1	-1.49374
MYDGF	0.38085
ANO8	0.362583
TUBE1	-0.153545
ARHGEF10L	0.327095
TXK	-0.487959
WSCD2	-0.490277
KCNQ2	1.4215
TACR2	-0.249085
ACTR6	-0.119135
TIPIN	0.0192304
SRI	0.137676
EIF4G3	-0.275548
NUP37	0.09568
SEMA3A	-0.284201
GTSE1	0.146304
SEMA3C	-0.303329
TTC38	0.376591
ACAT1	-0.0850109
GRAMD4	0.0716503
CELSR1	0.227007
WNT8B	-0.0685349
ZNF638	-0.33826
SLC25A40	-0.112738
TIMM21	0.0492819
ADD2	-0.591973
FGF4	0.306955
RASAL2	-0.413742
VPS9D1	0.21148
ZNF37A	-0.343317
MARK3	-0.0776199
SLC25A3	0.185364
FNDC3B	-0.654182
FOSL2	-0.122825
CACNG5	-0.0785042
CACNG4	-0.0493317
FRYL	-0.602624
TMEM131	-0.204815
FSCN1	0.215115
ACTB	0.261233
MOCOS	0.176772
PLD1	-0.358858
ATP12A	-1.06324
WDR62	0.434064
DLG1	-0.323206
RAB7A	-0.0498638
BCAP29	-0.251889
SEC31B	0.255346
SART3	0.10302
ARHGAP15	-0.697789
TUBA3D	0.112234
PAX2	0.595232
EXOSC7	0.307899
KIFAP3	-0.125751
MKRN2	0.00439692
MCM6	0.0804084
REXO2	-0.0805434
RBM7	-0.277281
RBMS2	-0.219692
BAZ2A	0.0129063
PTPN23	0.22506
MLH1	-0.0133301
UNG	0.132873
FMO4	-0.417815
KLHL20	-0.195963
RGS11	0.590501
SLC46A1	-0.0140497
PLXNA2	0.050933
SPAG5	0.0718432
ANKRD13A	-0.243138
TPD52	-0.151998
ACACB	-0.104101
TRAF4	0.438277
PAG1	-0.649413
GPATCH1	-0.0203255
ICAM3	-0.345368
NT5C2	-0.122844
MCAM	-0.246609
GPC4	-0.11676
MBNL3	-0.230181
CAMSAP3	0.476236
RAP1GAP	0.348998
XAB2	0.594683
ARHGEF1	0.210007
STXBP2	0.385471
MAP2K7	0.274674
NMRK2	0.187227
DGKD	0.167508
CTTNBP2	-0.137584
ACTL6B	-0.0992081
RARB	-0.647271
TOP2B	-0.335603
TM9SF3	-0.141372
NFKB2	0.266025
UBE2T	0.147733
PPP1R12B	-0.790945
DNAJC10	-0.304201
GTF3C1	-0.00522271
IL4R	0.00702558
USP33	-0.357588
PAK3	-1.05358
CAPN6	-1.02972
DCX	-0.832399
SNRPA	0.321925
SPAG6	-0.913925
EXOSC5	0.535018
DYNC1I2	-0.0848006
APBB1IP	-0.434859
LRCH4	0.280733
FAM76B	-0.326056
SIRT6	0.362678
TYR	0.595999
POLD3	-0.116382
ACTN2	-0.374995
CAPZB	0.005001
GPR137B	-0.215205
NAALAD2	-1.02482
JADE1	-0.0745948
SLC25A43	-0.0365684
UBE2A	-0.0631242
FGFR1	-0.261174
FKBP6	-0.0466191
SMC1B	-0.729401
FBLN1	-0.140121
ITGA8	-0.284729
CST7	-0.321768
MAP2	-0.421706
PIAS2	-0.526551
AMPH	-0.519484
ARAF	0.249451
MCCC1	-0.0384276
LAMP3	-0.244473
FAP	-0.768402
NEBL	-0.243434
ACER3	-0.336365
UBE2K	-0.147469
PIK3C3	-0.282362
N4BP2	-0.55686
TIGAR	-0.0843527
TULP3	0.0902564
SYNJ2	-0.130847
ADCY2	-0.56111
PPP2R5C	-0.161938
PMS2P1	0.094473
RBFOX1	0.124425
GNB1	0.0583764
HOXA9	0.0809609
EDN1	-0.347185
MLLT10	-0.0710528
ZCWPW1	-0.184851
ADCYAP1R1	-0.720919
FGF20	0.798189
P2RY10	-0.641402
ITM2A	-0.486307
NRDC	-0.0742671
VDAC3	-0.0431815
PCM1	-0.187642
TNRC6C	-0.206021
CBFA2T2	-0.0497727
BRINP1	-0.205319
ITCH	-0.379778
PKD2L2	-1.82919
TP53INP2	-0.378314
SDF4	0.220838
MYH7B	0.757208
BPIFB2	0.146787
TP73	0.339483
TOLLIP	0.296668
UBE2D4	0.0767498
CLUL1	-0.186128
RUNX1T1	-1.22015
CDH17	-0.0182473
THOC1	-0.139193
FKBP7	-0.346425
OSBPL6	-0.0737059
SLC1A3	-0.854515
XRCC5	-0.0762569
LXN	-0.269657
SP140	-0.552494
MKNK1	-0.0996372
TNS1	-0.82138
REXO1	0.511059
SAR1A	-0.149373
CDC14A	-0.328043
RAPGEF3	0.0592815
CEACAM1	-0.167501
SENP1	-0.156006
DUSP13	0.234778
CIC	0.160465
LIPE	0.361171
FDFT1	0.0644497
PAFAH1B3	0.559343
OPHN1	-0.42326
AFM	-0.661188
KIF22	0.222109
SCGN	0.0459641
CARMIL1	-0.0648452
PGM1	-0.080039
DDX1	-0.0353358
DNM2	0.232117
EPB41L2	-0.200583
RIMS1	-0.941883
MOXD1	-0.758439
STX7	-0.31499
RABL2B	-0.0468485
KEAP1	0.506827
DDX43	-0.132667
PTPRH	0.0523174
DCT	1.11243
SLC35C2	0.15202
CRYBG3	-0.88109
EPHA6	-1.48797
SCTR	-0.0706537
RFX3	-0.366351
RIF1	-0.590699
RAB21	-0.307308
SLC4A4	-0.549002
SMARCA2	-0.174662
RDH8	-0.799071
SESN1	-0.00519431
MID2	-0.205912
DNAAF6	-0.343142
COL5A3	-0.26463
SRCAP	-0.0275525
PUM3	0.0305126
CPB2	-0.700718
CHRNA3	-0.751028
KCNN2	0.239098
CNOT4	-0.216895
PSEN1	-0.157822
CPOX	0.0292605
CLDND1	-0.156201
MOK	-0.0650926
HSP90AA1	-0.0423787
RBL1	-0.361191
DLGAP4	-0.0332476
IGSF9B	0.0251666
CFHR2	0.129577
CROCCP3	-0.366405
NDC80	0.0600772
AP4E1	-0.335617
RSBN1	-0.451403
MAGI3	-0.37004
CXCL2	-0.269556
AFP	1.07697
COL4A4	-0.615593
TCF7	0.118581
OSTM1	-0.448656
CDH7	0.715238
IMPG2	-1.08991
PCNP	-0.177185
EXD2	-0.0714593
ARG2	-0.0230934
MEF2C	-0.815174
PTPRC	-0.888513
CACNA1S	-0.283256
PKP1	-0.148272
UBA5	-0.201992
STK17B	-0.465008
CDC14B	-0.0976873
ZNF510	-0.223402
LRP2	0.185361
ZNF506	-0.395658
JMJD4	0.304379
DUSP12	0.176829
AACS	0.241277
DELE1	0.22521
SLC13A1	-0.7313
CADPS2	-0.125125
PCDHB4	-0.587875
PCDHA6	-0.247497
PCDHGA2	-0.306689
HSPB11	-0.227988
PHLPP1	0.146237
ATP8B1	-0.128794
IL12RB2	-0.38285
SMARCD3	-0.0246859
WDR70	-0.00836728
FYB1	-1.02021
MPP4	-0.776253
STRADB	-0.134
BZW1	-0.2515
PGR	-1.30716
C1QTNF3	-0.55523
ME2	-0.225953
C5orf22	-0.222816
CCNT2	-0.331681
FAM135A	-0.487742
COL19A1	-1.4415
EPB41L3	-0.41961
COBLL1	-0.265639
DLG3	0.0231672
KCNK2	-0.903064
SERTAD4	-0.143151
TRAF5	-0.174859
MRPL22	0.240463
GEMIN5	-0.0172866
OPRK1	-0.844573
NFE2L1	-0.0227872
SEMA5B	-0.0247515
GSK3B	-0.213468
ITGB5	0.00225763
ERC1	-0.117044
XPO1	-0.211162
LINC01587	-2.25832
RNF13	-0.276658
TRPM3	-0.203909
PALB2	-0.123703
DOP1A	-0.452294
LYRM2	-0.181116
BCKDHB	-0.154945
KAT6A	-0.241365
TUT7	-0.235942
ULK2	-0.168965
GRHL2	0.065902
TNPO1	-0.3138
PLOD1	0.116434
P2RX5	0.0972542
ITGAE	0.034343
DIS3	-0.140973
PIBF1	-0.196131
TDRD3	-0.141625
AC000061.1	-0.743731
NUFIP1	-0.0307171
PDS5B	-0.364199
OXCT1	-0.222583
RRAGB	-0.121978
EPYC	-0.682088
CYLD	-0.552845
SLC27A5	0.83957
ZNF324	0.188445
ZNF671	-0.681657
ZNF416	0.0434044
ZNF586	-0.272556
ZNF446	0.207674
ZNF264	-0.523606
RPS5	0.877642
FAT1	-0.284429
YTHDC1	-0.0473666
CHMP2B	-0.246436
SMAP2	-0.109006
PPIE	0.144319
ZMPSTE24	-0.311164
STARD7	-0.0202838
NOA1	0.308755
REST	-0.487162
HAL	-0.204587
SSH1	-0.214536
GSTP1	0.521085
APLP2	-0.0024069
FAM234B	-0.127672
SLCO1A2	0.00453081
WBP11	0.0690157
EIF3I	0.134322
NKAIN1	0.399253
COL16A1	-0.158224
TXLNA	-0.0179213
APOB	1.35411
NCOA1	-0.318266
AGBL5	0.25628
EFR3B	0.018373
KIF3C	-0.131933
RAB10	-0.0915394
GCKR	-0.316333
HADHA	0.0961798
MAPRE3	0.171839
CAD	0.326453
CD59	-0.29004
CD82	0.142466
BCORL1	0.0538677
ATRX	-0.617827
AK6	-0.0672894
FCN1	-0.659798
MYNN	-0.128836
MECOM	-0.215133
SCAMP1	-0.277986
PREP	0.0806738
HACE1	-0.532974
SEH1L	-0.00488051
WDR47	-0.278127
WDFY1	-0.347611
OVGP1	0.104973
SLC25A24	-0.260833
MAP3K4	-0.0823407
PILRA	-0.301978
IGSF9	0.342455
ABCB1	0.123071
ZNF213	0.368401
AKR1B1	-0.104393
CPNE3	-0.209687
RRN3	-0.112132
CTTN	0.110881
WNT11	-0.0905497
MTIF2	-0.0669013
DDHD2	-0.296216
TTC39A	-0.0134839
EPS15	-0.385403
ORC1	0.155109
MGST2	0.087622
CHERP	0.283893
ATG16L1	0.0467535
USP40	-0.0548326
POMGNT1	0.136895
RAD54L	0.0799406
MAST2	0.0859414
DNAJA1	0.00653611
B4GALT1	-0.105394
CHMP5	-0.0457832
NFX1	0.0142779
AQP6	0.351583
DIMT1	-0.0747703
IPO11	-0.168875
FOLH1	-0.384265
EIF2AK1	0.105422
NME8	-1.06063
EPDR1	-0.0882028
SNX10	-0.563395
SEPHS1	0.194516
MRPL28	0.337615
HBQ1	1.50232
ITPKC	0.176152
CEACAM6	-0.393039
FAT2	-0.445491
RBM22	0.0474358
TMED2	-0.213587
ERO1B	-0.628711
ZFAND6	-0.183204
HSD17B2	0.0717283
TXLNG	-0.243828
PPEF1	-0.481322
LAT2	-0.143207
HUWE1	-0.127252
ZW10	-0.132239
ALG9	-0.198549
MYBPC2	0.17279
NOX4	-0.864
ACOX3	0.0978714
MTMR2	-0.226258
PPP1R15A	0.200934
HSD17B14	0.0766772
TRIP6	0.366649
ACHE	-0.00663485
FTL	0.0747687
SRRT	0.244433
BAX	0.315081
NLK	-0.144693
PIGS	0.104979
ADAMTS2	-0.32716
TMPRSS11E	0.914536
ATXN7L3	0.16174
PGS1	0.128986
PSMC5	0.241132
UIMC1	0.0143643
CETP	-0.229994
MMP2	-0.448929
MT3	0.913716
LPCAT2	-0.337813
GNAO1	-0.691066
OGFOD1	-0.0254661
SH3BP2	-0.0528858
NOP14	0.122053
ADD1	-0.0313334
L2HGDH	-0.0665564
TXNDC16	-0.112049
RTRAF	0.0313104
NID2	-0.234378
GMCL1	-0.139523
SF3B2	0.0622941
KLHL42	-0.222463
GNAS	0.181587
DNM1L	-0.211212
PTHLH	-0.370262
PHACTR3	-0.343591
ERGIC2	-0.264173
TFAP2C	-0.107517
AURKA	-0.0102166
CASS4	-0.690529
PIR	-0.176497
AAMDC	0.145983
RFX2	0.0980669
METTL2A	0.00595107
SULT2B1	0.728292
ALG6	-0.242463
CNOT3	0.354978
GP6	-0.43963
PTPN4	-0.465504
DDX18	-0.0925704
KHSRP	0.263806
GNA11	0.216719
ASAP3	-0.0878728
EDEM2	0.0704487
DNMT3B	0.0427682
REM1	-0.238738
TPX2	-0.0108561
FER1L4	-0.0222119
PDRG1	0.231239
EPB41L1	-0.0565328
SLC15A1	0.265503
DOCK9	-0.206575
ANKRD10	-0.0946129
TGDS	0.039453
DOCK3	0.018683
C3orf18	0.00750283
COQ9	0.202961
TMEM40	0.291349
KIF9	0.205624
ARHGAP28	-0.699193
CRLS1	-0.00865414
DEFB127	0.213906
PPP1R13B	0.0802257
ATRN	-0.194062
SMOX	0.372397
SIGLEC1	-0.2205
FKBP1A	-0.127634
NSFL1C	0.0904552
SLC4A11	0.411811
C20orf194	-0.773975
ZNF343	-0.0276575
EBF4	0.248915
CPXM1	-0.0740645
MAVS	-0.032292
LZTS3	0.231935
F11	0.400588
XRN2	-0.10662
KIZ	0.234886
DYNLL1	0.0750964
TESC	0.43757
SNX5	0.0214872
RPL6	0.146299
SIRPG	-0.224455
MAPKAPK5	-0.0639651
P2RX7	-0.654294
ESF1	-0.210669
RBBP9	-0.174602
ANAPC5	0.105798
SLC23A2	-0.12796
SLC8B1	0.0826276
TMEM230	-0.0562353
DZANK1	-0.239776
KDM2B	0.126748
CFAP61	-0.195658
LHX5	0.355116
TASP1	-0.0767149
OAS1	-0.0150065
GCN1	0.197016
RPLP0	0.657962
PXN	0.128091
SIRT4	0.198188
RPH3A	-0.559573
KIF16B	-0.0602574
TRMT6	-0.0138102
CHGB	0.31633
PEBP1	0.307085
TBX5	-0.513232
BRAP	-0.0278653
ERP29	0.207994
NOS1	-0.686347
FUS	0.254464
IGBP1	0.215444
FXYD5	0.342665
ZNF302	-0.169723
GRAMD1A	0.243969
FXYD3	0.0500088
HEPH	-0.0738187
CDIP1	-0.041335
CMTM1	-0.0939542
KCNH4	0.354375
GANAB	0.0423784
GMIP	0.186211
RBM41	-0.528993
BIRC5	0.213647
LAG3	0.268622
MLF2	0.303479
OTUB2	-0.190117
DDX24	-0.0674837
ZBTB25	-0.329627
NECAP1	-0.0737301
ARHGAP4	0.527653
ANKRD24	0.597029
DHX32	0.0696652
RCOR1	-0.0942246
GPATCH2L	-0.596298
LTBP4	0.465951
BLVRB	0.698162
SLC9A1	0.022672
SPTLC1	0.0255605
PAPOLA	-0.30032
CCNK	-0.193714
PCBP4	0.395577
RGS1	-0.510518
YPEL3	0.133878
MRPS33	0.154671
NDUFB2	0.238469
NUDC	0.18314
MAEA	0.273792
ICAM1	-0.149239
STRN4	0.349252
IRAK3	-1.13981
LYZ	-0.122225
SI	0.453983
MUL1	0.0560413
TFAP4	0.248635
PDCD7	0.0743389
SPG21	0.0464016
FETUB	0.141139
DNAJB11	-0.0794604
P3H2	-0.284196
THPO	-0.310099
CHRD	-0.0821399
FLT3LG	-0.00495041
RAB11FIP3	0.287169
GNPTG	0.127446
ZNF268	-0.226233
GOLGA3	0.00180328
PABPC4	0.183516
CD209	-0.49285
CERS4	0.361361
MCOLN1	0.291435
USP48	-0.175277
EFNB1	0.126129
PDPR	-0.0834124
AARS1	0.228438
GLG1	-0.0236411
KIF4A	0.0026277
TNRC6A	-0.321313
PLEKHG2	-0.135288
DLL3	1.06117
NAT14	0.446914
PITPNM2	0.27777
EXOC1	-0.1778
RBM27	-0.214597
POU4F3	0.11942
OSBPL8	-0.611609
DTX2	0.370837
NLRC4	-0.661619
PUS7	-0.0525543
LAMB4	-0.565231
NRCAM	0.822674
LAMB1	-0.0793936
SLC26A4	-0.177971
SLC26A3	-0.804268
DLD	-0.0965394
WDR7	-0.502504
TXNL1	-0.0373925
IL5RA	-0.653313
ABCC6	0.24564
CMTM6	-0.305066
ITGA6	-0.185134
RAPGEF4	-0.0471151
MAP3K20	-0.214817
SMPX	-0.565774
FH	0.107525
SEL1L3	-0.0709319
TF	0.923373
CDV3	-0.130039
MYO15A	-0.201717
ALKBH5	-0.0126035
APOH	0.439706
NLRP1	-0.32343
PITPNM3	0.0958451
SPAG7	0.229297
ORC6	0.144844
ZFHX4	-1.31695
SLC17A6	-0.174693
CPA1	-0.0191581
ZC3HC1	0.153738
ESR1	-1.26702
RGS17	-0.868378
ANGPT2	-0.465684
TMEM101	0.469536
CD200	-0.338266
CCDC80	-0.974616
CMA1	-1.02312
PSME1	0.184282
PPP2R3C	-0.219264
HAUS4	0.183597
JPH4	-0.336876
MYH7	0.122531
CEBPE	0.109933
SLC7A8	-0.136053
OSGEP	0.203429
SLC22A17	-0.119728
RNF31	0.170786
SCFD1	-0.210124
G2E3	-0.375437
HECTD1	-0.314467
HNRNPC	0.0467795
RPGRIP1	-0.18327
SUPT16H	0.0164223
TOX4	-0.0095502
GEMIN2	-5.73318e-05
TGM1	0.448583
TINF2	0.0115813
DAZL	-1.65308
TBL1Y	0.657917
SEMA6A	-0.469211
TRPM7	-0.330172
TYRO3	0.560541
WDR76	0.0426847
CAPN3	-0.215531
SNAP23	-0.138956
TBX15	-0.247696
PHGDH	0.650856
COL9A3	0.534683
EZR	0.0538011
MYL6	0.146417
AGO1	-0.277185
TEKT2	0.233338
CLSPN	-0.240288
RFFL	-0.143058
UNC13D	0.219131
MFSD11	-0.19752
DPYSL2	-0.020323
TGFB2	-0.188563
GPATCH2	-0.268532
NUP50	-0.251789
CDC45	0.278159
COMT	0.633416
ADA2	-0.512881
AC016026.1	-1.27081
VNN3	-0.923956
ECHDC1	-0.238876
LRRFIP2	-0.23312
[truncated: 54,494 more rows]
